# Supplementary material for: Clinical phenotype of ASD-associated DYRK1A haploinsufficiency
Source: PubMed Central journal article supplement (PMC5629761; doi:10.1186/s13229-017-0173-5), 2017-10-05

Scale chr21: 100 kb | hg19  
 38,750,000 | 38,800,000 | 38,850,000 | 38,900,000

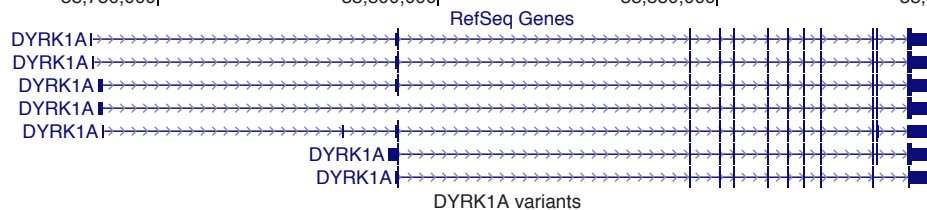

DYRK1A variants

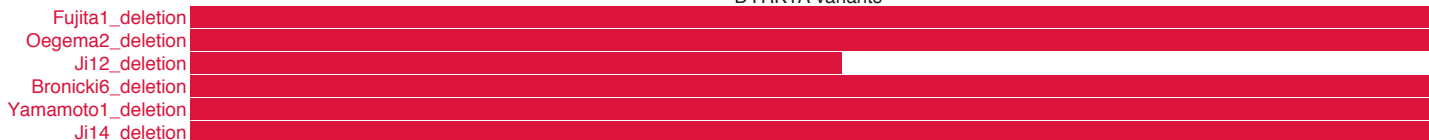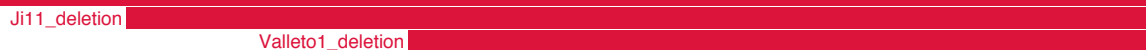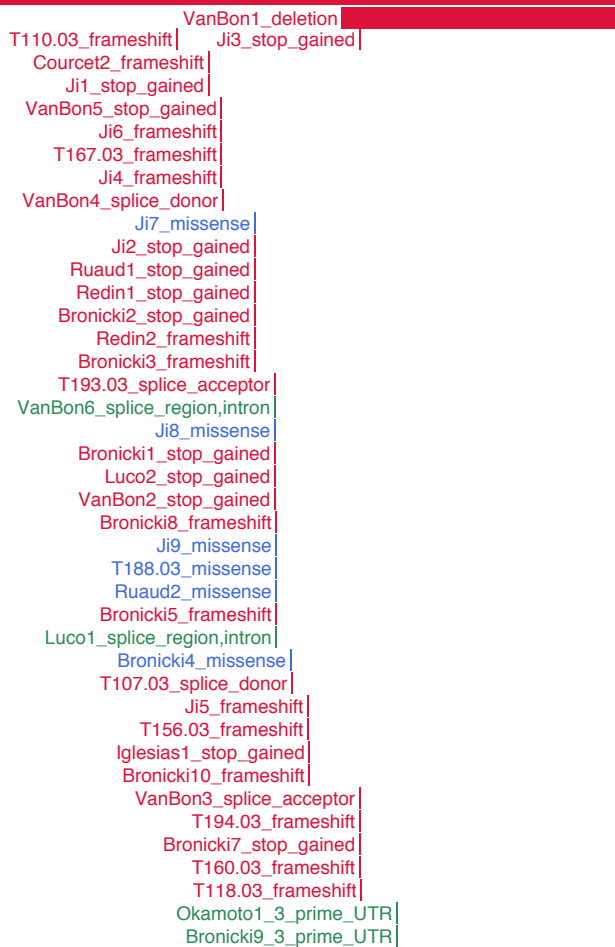

DYRK1A mosaic variants

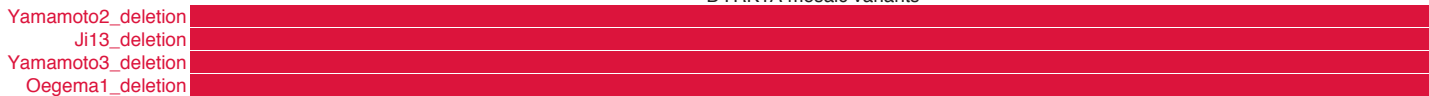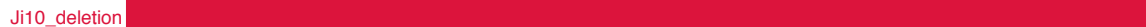

Supplement: 13229_2017_173_MOESM2_ESM.pdf [file 13229_2017_173_MOESM2_ESM.pdf]
